# Supplementary material
Source: publisher figshare collection journal article supplement (https://gsapubs.figshare.com/ndownloader/files/25541726)
Supplement: Supplementary file 1 [file 25541726]

## Sheet: Tabelle1
DR7: Representative LA-ICP-MS trace element composition of olivine
	V6 605m				V6 570m		V6 422m		V6 395m		KL24 203m			KL24 190m
Analysis	fa6-5	fa6b-2	fa6b-1		fa4-2		fa3-2		fa6-1		F2.3	F2.6		F1.3	F1.5
Texture	cumulus	intercumulus			cumulus		cumulus		cumulus		cumulus			cumulus
	core	core	rim		core		core		core		core	outer rim		core	rim
ppm
Li	14.1	15.63	6.84		9.78		34.33		22.33		159.37	85.49		106.77	55.67
Na	5.24	15.04	84.91		20.52		7.77		3.26		8.3	11.15		5.01	bdl
Al	2.93	7.7	45.43		6.76		3.51		4.07		3.31	3.11		3.3	2.71
P	49.8	90.6	70.6		47.5		51.4		51.1		56.15	32.7		49.72	39.91
K	bdl	bdl	4.58		bdl		bdl		bdl		bdl	bdl		bdl	bdl
Ca	837.72	1302.99	2342		729.53		839.36		717.61		1137.38	1079.29		1373.81	1018.34
Sc	16.85	12.97	14.35		10.32		14.95		26.18		95.23	36.31		47.57	37.93
Ti	31.28	5.49	24.03		25.74		67.45		60.5		274.75	132.34		350.34	109.54
V	0.11	bdl	bdl		0.353		0.137		0.208		0.702	0.176		0.416	0.153
Cr	7.99	10.02	7.95		8.77		9.71		8.52		14.31	15.2		16.09	15.06
Mn	10053.2	10587.9	10750.5		10083.9		9502.51		9308.36		18822.3	19237.6		18001.2	17487.3
Co	20.43	22.22	22.61		16.15		19.24		17.43		22.22	22.26		21.94	23.76
Ni	5.7	3.93	4.36		3.32		6.13		3.59		6.36	5.64		6.98	7.81
Cu	0.158	0.28	0.48		0.9		bdl		bdl		0.184	bdl		bdl	bdl
Zn	1032.12	1240.61	1241.63		366.21		452.91		394.66		496.78	494.24		453.6	473.44
Rb	bdl	0.197	bdl		bdl		bdl		0.052		0.313	0.078		0.176	0.063
Sr	0.027	0.091	0.192		0.102		0.052		0.082		0.427	0.115		0.235	0.05
Y	63.07	85.67	51.41		56.19		69.75		96.78		639.25	165.06		533.96	106.01
Zr	1.54	10.64	1.61		1.49		3.59		5.53		79.87	24.55		39.28	38.87
Nb	nd	nd	nd		nd		nd		nd		252.45	75.85		170.44	89.48
La	bdl	0.069	1.54		0.041		0.012		bdl		bdl	bdl		bdl	0.0059
Ce	0.035	0.183	2.67		0.111		0.0159		bdl		0.0347	0.0176		0.067	0.016
Pr	0.0129	bdl	0.316		0.014		bdl		0.012		0.0159	bdl		0.02	0.0112
Nd	0.08	0.171	1.83		bdl		bdl		0.062		0.085	0.032		0.208	0.054
Sm	bdl	0.18	0.52		bdl		0.086		0.057		0.22	0.103		0.5	0.072
Eu	bdl	0.021	bdl		bdl		0.0182		0.011		bdl	0.0099		0.0214	0.0134
Gd	0.459	0.58	0.59		0.22		0.302		0.406		1.25	0.8		1.99	0.522
Tb	0.184	0.296	0.242		0.171		0.195		0.236		0.83	0.441		1.4	0.308
Dy	3.98	4.61	2.94		3.69		3.96		4.7		19.66	8.43		24.19	5.12
Ho	1.68	2.49	1.6		1.5		1.82		2.48		13.32	4.52		11.81	2.79
Er	11.42	19.31	10.08		10.91		13.01		19.44		120.55	36.34		81.53	21.25
Tm	4.04	9	3.95		4.44		4.52		7.16		49.99	13.78		27.3	8.52
Yb	47.3	130.17	53.85		56.4		53.57		92.04		710.33	199.75		332.77	124.72
Lu	9.95	32.48	13.49		11.83		11.43		20.19		154.76	49.61		64.14	36.53
Hf	nd	nd	nd		nd		nd		nd		2.37	0.88		0.956	1.75
Ta	nd	nd	nd		nd		nd		nd		6.4	2.11		3.31	2.98
Pb	nd	nd	nd		nd		nd		nd		0.044	0.139		0.055	0.06
Th	nd	nd	nd		nd		nd		nd		bdl	bdl		bdl	bdl
U	nd	nd	nd		nd		nd		nd		0.344	0.0507		0.321	0.0647
La/YbCN	-	0.0004	0.0205		0.0005		0.0002		-		-	-		-	3e-05
Eu/Eu*CN	-	0.36	-		-		0.31		0.19		-	0.17		0.37	0.23
moles
Li	2.03141	2.25184	0.985449	0	1.40902		4.94597		3.21712		22.9607	12.3167		15.3825	8.02046
HREE+Y	1.16408	2.10742	1.0754	0	1.14601		1.29667		1.9338		13.3624	3.66294		9.14769	2.34216
mole ratio
Li/(HREE+Y)	1.74508	1.06853	0.916359	#DIV/0!	1.2295		3.81437		1.66362		1.71831	3.36251		1.68157	3.42439
nd: not detected
bdl: below detection limit

## Sheet: G48417
Brandt, S., et al., 2021, Cumulate olivine: A novel host for heavy rare earth element mineralization: Geology, v. 49, https://doi.org/10.1130/G48417.1
